# Supplementary material for: In situ doping and crosslinking of fullerenes to form efficient and robust electron-transporting layers for polymer solar cells
Source: Royal Society of Chemistry journal article supplement (doi:10.1039/c3ee42509f), 2013-10-22
Supplement: c3ee42509f.pdf [file c3ee42509f.pdf]

# Supporting information

## ***In-situ* Doping and Crosslinking of Fullerenes to Form Efficient and Robust Electron-Transporting Layer for Polymer Solar Cells**

Namchul Cho,<sup>†</sup> Chang-Zhi Li,<sup>†</sup> Hin-Lap Yip and Alex K.-Y. Jen<sup>\*a,b</sup>

<sup>a</sup> *Department of Materials Science and Engineering, University of Washington, Seattle, Washington 98195.*

<sup>b</sup> *Department of Chemistry, University of Washington, Seattle, Washington 98195.*

E-mail: [ajen@u.washington.edu](mailto:ajen@u.washington.edu)

General. All reactions dealing with air- or moisture-sensitive compounds were carried out using standard Schlenk technique. All <sup>1</sup>H (500 MHz) and <sup>13</sup>C (125 MHz) NMR spectra were recorded on a Bruker AV500 spectrometer. Spectra were reported in parts per million from internal tetramethylsilane (δ 0.00 ppm) or residual protons of the deuterated solvent for <sup>1</sup>H NMR and from solvent carbon (e.g. δ 77.00 ppm for chloroform) for <sup>13</sup>C NMR. AFM images under tapping mode were taken on a Veeco multimode AFM with a Nanoscope III controller. Cyclic voltammetry (CV) measurements were carried out in a one-compartment cell under N<sub>2</sub>, equipped with a glassy-carbon working electrode, a platinum wire counter electrode, and an Ag/Ag<sup>+</sup> reference electrode. Measurements were performed in ODCB/MeCN (5:1 v/v) (0.5 mM) containing Tetrabutylammonium Hexafluorophosphate (0.1 M) as a supporting electrolyte with a scan rate of 100 mV/s. All potentials were corrected against Fc/Fc<sup>+</sup>. C<sub>60</sub> and PCBM were purchased from American Dye Source. The Matrix for MALDI-TOF-MS used 2:1 mixture of alpha-cyano-4-hydroxycinnamic acid (CHCA)/2,5-dihydroxybenzoic acid (DHB) in acetonitrile. C<sub>60</sub> was purchased from American Dye Source. 4-vinylbenzyl Chloride was purchased from Sigma-Aldrich. Unless otherwise noted, materials were purchased from Aldrich Inc., and used after appropriate purification.

**Synthesis of 1,4-di(vinylbenzyl) fullerene (Full-s):** To a freeze-thaw degassed mixture of C<sub>60</sub> (2000 mg, 2.78 mmol) and 1-methylnaphthalene (11.8 mL, 83 mmol, 30 equiv.) in 250 mL THF, metal Potassium (271 mg, 6.95 mmol) was added in one portion. A dark red solution was produced after

stirring under argon at room temperature for 5 h. 4-Vinylbenzyl chloride (8.5 ml, in 90% purity, ~ 54 mmol) was then added dropwisely. After stirring for another 3.5 h, the reaction mixture was heated at 50 °C overnight then quenched with degassed, saturated aqueous NH<sub>4</sub>Cl (2 mL). The resulting concentrated mixture was precipitated into methanol. The crude product was pre-absorbed in silica gel, then separated with a silica gel column (eluent: first with CS<sub>2</sub>/hexane = 1/5, then CS<sub>2</sub>/hexane = 1/2, then CS<sub>2</sub>) to afford a compound in 45 % yield. **Full-s** <sup>1</sup>H 500 MHz NMR (CDCl<sub>3</sub>): δ 3.88 (s, 4H, CH<sub>2</sub>), 5.27 (dd, *J*<sub>1</sub> = 5.0 Hz and *J*<sub>2</sub> = 0.9 Hz, 2H), 5.27 (dd, *J*<sub>1</sub> = 8.25 Hz and *J*<sub>2</sub> = 0.9 Hz, 2H), 6.76 (dd, *J*<sub>1</sub> = 3.30 Hz and *J*<sub>2</sub> = 10.8 Hz, 2H), 7.56 (m, 8H, Ar-H) <sup>13</sup>C NMR (125 MHz, CDCl<sub>3</sub>): δ 48.44, 60.47, 114.01, 128.26, 131.22, 135.76, 138.84, 140.54, 141.98, 142.45, 142.64, 142.97, 143.09, 143.19, 143.71, 143.94, 144.12, 144.25, 144.27, 144.37, 144.67, 144.69, 144.77, 145.01, 145.50, 146.14, 146.92, 146.97, 147.17, 148.63, 148.64, 151.72, 157.71; MALDI-TOF-MS (+): calcd. for [C<sub>76</sub>H<sub>18</sub>O<sub>2</sub>]<sup>+</sup>, 954.98, found. [M-H]<sup>+</sup>, 953.20, [M-vinylbenzyl]<sup>+</sup>, 836.36

15

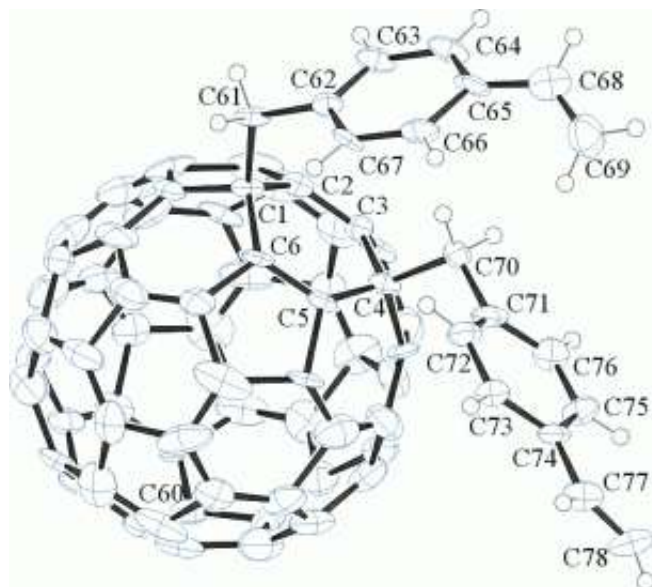

**Figure S1.** ORTEP of the structure with thermal ellipsoids at the 50% probability level. Black red plate crystals of **full-s** suitable for single-crystal X-ray diffraction were obtained by slow evaporation of hexane/carbon disulfide solution.

20

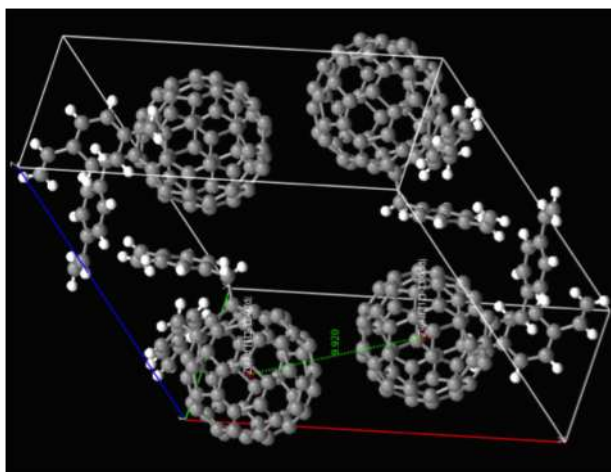

**Figure S2.** Single-crystal analysis of **full-s** showed the closest centre-to-centre distance of 0.99 nm for two fullerenes.

5

**Table S1:** Crystallographic data for the structures provided.

|                                      |                                             |                   |
|--------------------------------------|---------------------------------------------|-------------------|
| Empirical formula                    | C <sub>78</sub> H <sub>18</sub>             |                   |
| Formula weight                       | 954.92                                      |                   |
| Temperature                          | 100(2) K                                    |                   |
| 10 Wavelength                        | 0.71073 Å                                   |                   |
| Crystal system                       | Monoclinic                                  |                   |
| Space group                          | P 1 2 <sub>1</sub> /c 1                     |                   |
| Unit cell dimensions                 | a = 21.462(11) Å                            | α = 90°.          |
|                                      | b = 10.226(5) Å                             | β = 109.458(13)°. |
|                                      | c = 19.538(10) Å                            | γ = 90°.          |
| 15 Volume                            | 4043(4) Å <sup>3</sup>                      |                   |
| Z                                    | 4                                           |                   |
| Density (calculated)                 | 1.569 Mg/m <sup>3</sup>                     |                   |
| Absorption coefficient               | 0.090 mm <sup>-1</sup>                      |                   |
| 20 F(000)                            | 1944                                        |                   |
| Crystal size                         | 0.30 x 0.17 x 0.05 mm <sup>3</sup>          |                   |
| Theta range for data collection      | 1.73 to 25.19°.                             |                   |
| Index ranges                         | -25 ≤ h ≤ 25, -11 ≤ k ≤ 12, -23 ≤ l ≤ 23    |                   |
| Reflections collected                | 21316                                       |                   |
| 25 Independent reflections           | 6814 [R(int) = 0.1598]                      |                   |
| Completeness to theta = 25.00°       | 93.5 %                                      |                   |
| Max. and min. transmission           | 0.9955 and 0.9735                           |                   |
| Refinement method                    | Full-matrix least-squares on F <sup>2</sup> |                   |
| Data / restraints / parameters       | 6814 / 60 / 705                             |                   |
| 30 Goodness-of-fit on F <sup>2</sup> | 1.028                                       |                   |
| Final R indices [I > 2σ(I)]          | R1 = 0.1487, wR2 = 0.3398                   |                   |

|                             |                                    |
|-----------------------------|------------------------------------|
| R indices (all data)        | R1 = 0.2784, wR2 = 0.4411          |
| Extinction coefficient      | 0.010(2)                           |
| Largest diff. peak and hole | 0.832 and -0.466 e.Å <sup>-3</sup> |

***Fabrication and characterization of OTFT devices:*** A top contact OTFT devices were fabricated on silicon substrates. Heavily p-doped Si/SiO<sub>2</sub> (300nm) substrates were purchased from Montco Silicon Technologies Inc. The substrates were cleaned by sequential ultra-sonication in acetone, methanol, and isopropyl alcohol. A thermally crosslinked divinyltetramethylsiloxane-bis(benzocyclobutene) (BCB) (Dow Chemicals, Product# XU-13005.02) layer was used to passivate the surface hydroxyl groups on the SiO<sub>2</sub> gate dielectric. The BCB diluted in toluene was spin-coated at 4000 rpm for 60 s. The film was annealed at 250 °C for 4 h under nitrogen for crosslinking. The thickness of the BCB film was 12 nm. The Full-x (bis-FPI) films were prepared from a 2 wt % chlorobenzene solution by spin-coating (5000 rpm for 120s). The gold (50 nm thick) electrodes were deposited on top of the fullerene films by thermal evaporation at 1.0 Å/s through a shadow mask under high vacuum ( $5.0 \times 10^{-7}$  torr). The devices were characterized in a glove box with an Agilent 4155B semiconductor parameter analyzer. Charge carrier mobility was calculated with a linear fit of the saturation region of the square root of  $I_{ds}$  versus  $V_{gs}$  using the standard equation:  $I_{ds} = [(\mu WC_0/2L)/(V_g - V_t)^2]$ , where  $W$ ,  $C_0$ , and  $L$  are channel width (1000 μm), capacitance of gate dielectrics (10.4 nF/cm<sup>2</sup>) and channel length (20 μm), respectively. Figure S4a and S4b showed the linear fit of the saturation region of the square root of  $I_{ds}$  versus  $V_{gs}$ .

The conductivity was derived from two-terminal measurements with the equation of  $\sigma = (L/A)(I_d / V_d)$ , where  $L$  and  $A$  are the channel length and cross-sectional area of the devices, respectively. The conductivities calculated from the slope of  $V_d$ – $I_d$  curves (Figure S4e and S4f) at zero gate voltage are summarized in Table 2 and Table S3. The slope was estimated with a linear fit of  $V_d$ – $I_d$  curves.

***Fabrication of PSCs:*** ITO coated glass substrates were cleaned by sequential ultrasonication in acetone, methanol, and isopropyl alcohol, and then treated with oxygen plasma. The ETLs (Full-x and Full-x (bis-FPI)) were prepared from a 2 wt % chlorobenzene solution by spin-coating (2000 rpm and 5000 rpm for 120s). The substrates were submitted to a thermal annealing (210 °C for 30 min) under N<sub>2</sub> atmosphere. The active layers were deposited on ETLs by spin coating the PIDT-PhanQ:PC71BM

(1:3, weight ratio) solution (40 mg/ml in DCB) and then annealed at 110 °C for 10 min in the glove box. A MoO<sub>3</sub> (5 nm) was then deposited via thermal evaporation at a rate of 0.2 Å/s. Afterward, a metal electrode (Ag) (100 nm) was vacuum-deposited at a rate of 2 Å/s.

5

10

15

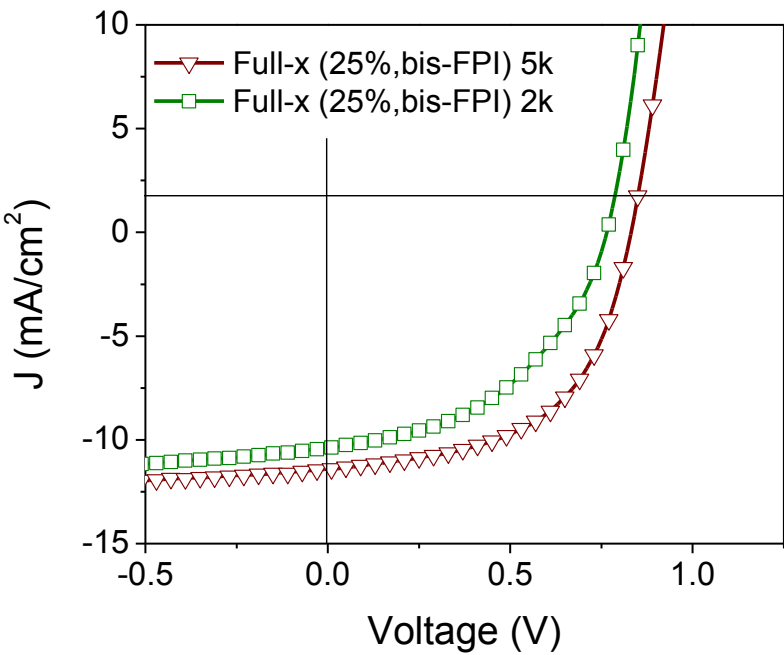

**Figure S3.** The thickness dependence of device performance for Full-x (25%, bis-FPI) fabricated by two different spin speed (5k rpm for 12 nm and 2k rpm for 24 nm).

25

**Table S2.** Summary of device performance with different thickness of ETLs.

| ETL                          | PCE<br>(%) | V <sub>oc</sub><br>(V) | J <sub>sc</sub><br>(mA/cm <sup>2</sup> ) | FF   |
|------------------------------|------------|------------------------|------------------------------------------|------|
| Full-x (25%, bis-FPI), 12 nm | 5.26       | 0.83                   | 11.4                                     | 0.56 |
| Full-x (25%, bis-FPI), 24 nm | 3.66       | 0.76                   | 10.4                                     | 0.46 |

30

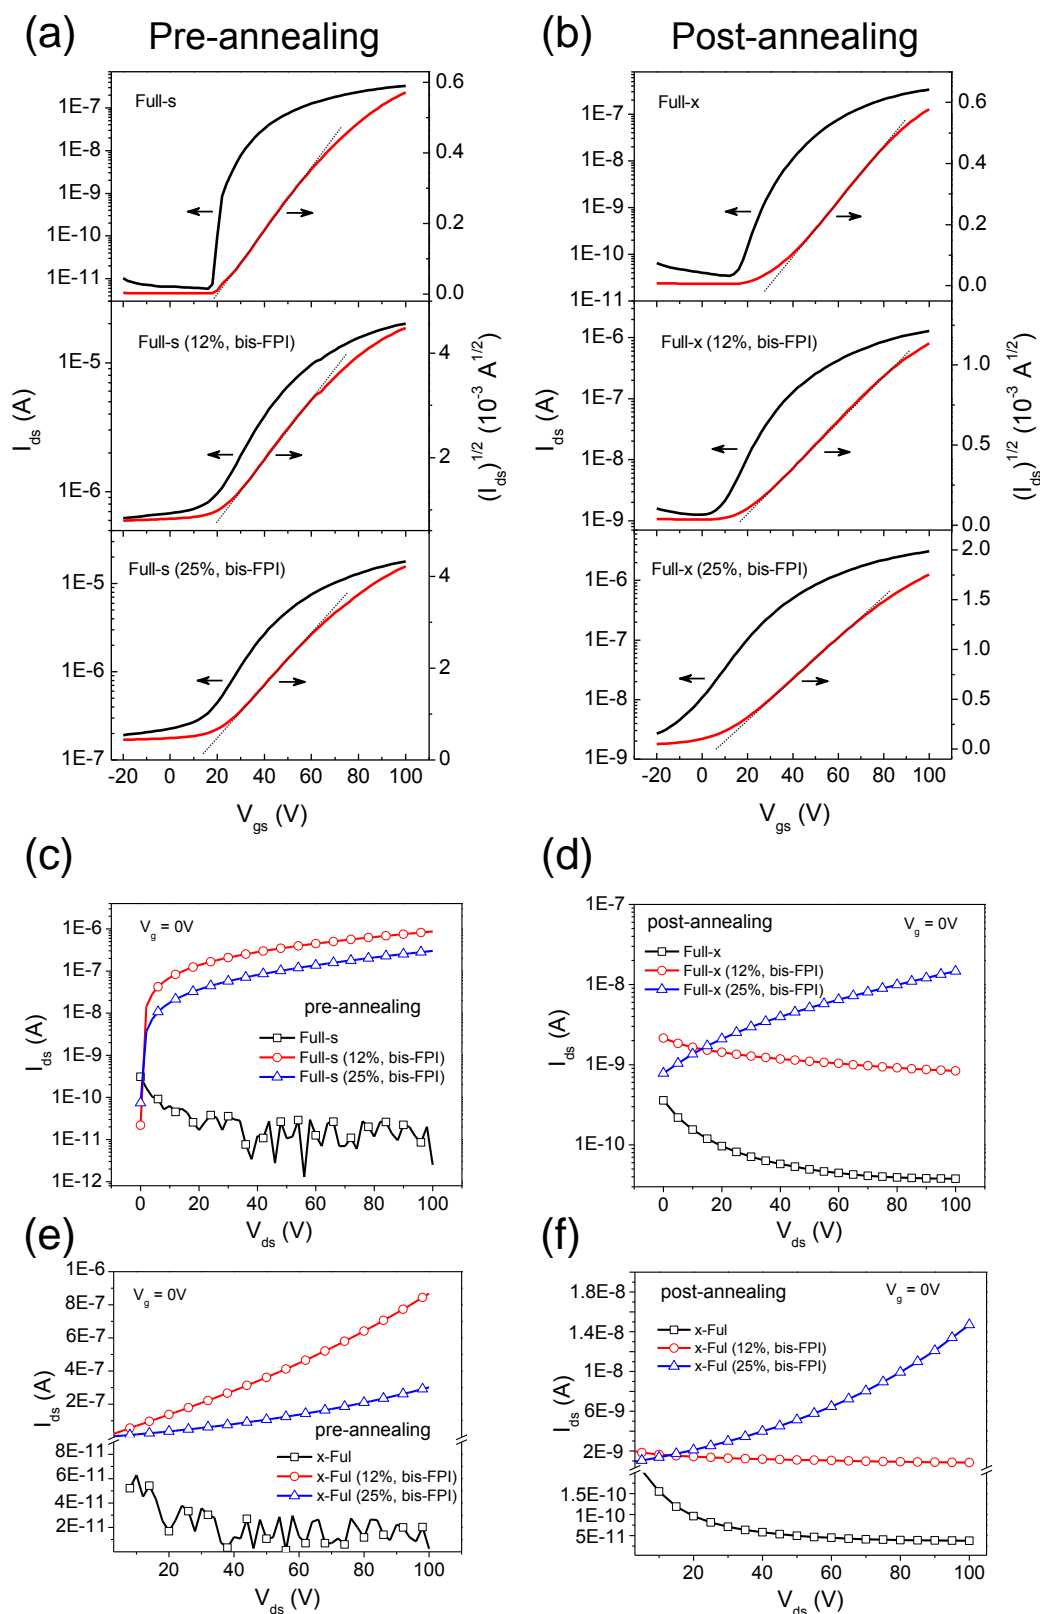

**Figure S4.** (a) Transfer characteristics of OTFT devices at varying bis-FPI concentration for Full-s (pre-annealing: before crosslinking) and (b) for Full-x (post-annealing: after crosslinking). (c, d) output characteristics for the same devices before and after crosslinking in semi-log scale of  $I_{ds}$  and (e, f) linear scale of  $I_{ds}$ .

**Table S3.** Summary of the performance of pre-annealed OFET devices based on various ETMs.

| ETL                   | $\sigma$<br>(S/m)    | $\mu$<br>(cm <sup>2</sup> /V·s) | $I_{\text{on}}/I_{\text{off}}$ | $V_t$<br>(V) |
|-----------------------|----------------------|---------------------------------|--------------------------------|--------------|
| Full-s                | $1.3 \times 10^{-7}$ | $3.4 \times 10^{-4}$            | $5.6 \times 10^4$              | 21           |
| Full-s (12%, bis-FPI) | $9.1 \times 10^{-3}$ | $1.5 \times 10^{-2}$            | $3.2 \times 10^1$              | 9            |
| Full-s (25%, bis-FPI) | $2.0 \times 10^{-3}$ | $8.1 \times 10^{-3}$            | $9.3 \times 10^1$              | 13           |

**Measurements of the capacitance density of gate dielectrics:** The total capacitance densities of the gate dielectric layers were measured from parallel-plate capacitors with p<sup>++</sup>Si/SiO<sub>2</sub>/BCB/Ag and p<sup>++</sup>Si/SiO<sub>2</sub>/Ag structures using the equation:  $1/C_0 = [(d_{\text{SiO}_2}/k_{\text{SiO}_2}) + (d_{\text{BCB}}/k_{\text{BCB}})](1/\epsilon_0)$ , where  $\epsilon_0$ : vacuum permittivity,  $k$ : the dielectric constant of the gate dielectric materials,  $d$ : thickness). Capacitance-voltage measurements were performed using a HP 4284A LCR meter at room temperature for frequencies from 500 Hz to 300 KHz. The capacitance density vs. frequency for SiO<sub>2</sub> (300 nm) and SiO<sub>2</sub> (300 nm)/BCB (12 nm) is shown in **Figure S4**. The capacitance densities of SiO<sub>2</sub> and SiO<sub>2</sub>/BCB were ~10.9 and 10.4 nF/cm<sup>2</sup>, respectively. The dielectric constant of the BCB was extracted from the accumulation capacitance of the capacitance-voltage curves by assuming that the total capacitance corresponds to the series combination of BCB and SiO<sub>2</sub> ( $1/C_{\text{total}} = 1/C_{\text{SiO}_2} + 1/C_{\text{BCB}}$ ), where  $C = \epsilon_0 k A/d$ . The active area of device ( $A$ ) is  $3.14 \times 10^{-2}$  cm<sup>2</sup>. The dielectric constant of BCB we calculate is ~2.7.

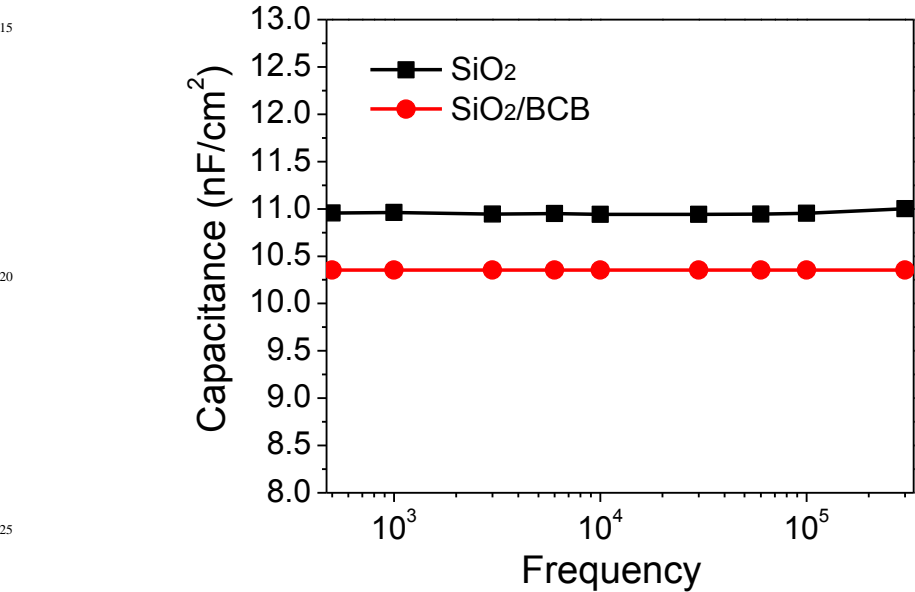

**Figure S5.** Capacitance density vs. frequency for SiO<sub>2</sub> and SiO<sub>2</sub>/BCB gate dielectrics.
